# Supplementary material for: Functionalization of graphene oxide with a hybrid P, N ligand for immobilizing and stabilizing economical and non-toxic nanosized CuO: an efficient, robust and reusable catalyst for the C–O coupling reaction inO-arylation of phenol
Source: Royal Society of Chemistry journal article supplement (doi:10.1039/d1nj05273j), 2022-01-01
Supplement: d1nj05273j1.pdf [file d1nj05273j1.pdf]

**Electronic Supplementary Material (ESI)**

for

**Functionalization of graphene oxide with a hybrid P, N ligand for immobilizing and stabilizing economical and non-toxic nanosized CuO: An efficient, robust and reusable catalyst for C–O coupling reaction in O-arylation of phenol**

Preeti Oswal, Aayushi Arora, Siddhant Singh, Divyanshu Nautiyal, Sushil Kumar and Arun Kumar\*

*Department of Chemistry, School of Physical Sciences, Doon University, Dehradun, India.*

*Corresponding author: Arun Kumar, e-mail: [arunkaushik@gmail.com](mailto:arunkaushik@gmail.com), [akumar.ch@doonuniversity.ac.in](mailto:akumar.ch@doonuniversity.ac.in)*

## TABLE OF CONTENTS

| Sections                                                                                                                                                                                                                                                                                                                                                                            | Figures                                                                                                                                                                                                                                                                                                                                                                                                                                                                                                                                                                                                                                                                                                                                                                                                                                                                                                                                                                                                                                                                                                                                                                                                                                                                                                                                                                                                                                                                                                                                                                      | Tables                                                                                                                                   |
|-------------------------------------------------------------------------------------------------------------------------------------------------------------------------------------------------------------------------------------------------------------------------------------------------------------------------------------------------------------------------------------|------------------------------------------------------------------------------------------------------------------------------------------------------------------------------------------------------------------------------------------------------------------------------------------------------------------------------------------------------------------------------------------------------------------------------------------------------------------------------------------------------------------------------------------------------------------------------------------------------------------------------------------------------------------------------------------------------------------------------------------------------------------------------------------------------------------------------------------------------------------------------------------------------------------------------------------------------------------------------------------------------------------------------------------------------------------------------------------------------------------------------------------------------------------------------------------------------------------------------------------------------------------------------------------------------------------------------------------------------------------------------------------------------------------------------------------------------------------------------------------------------------------------------------------------------------------------------|------------------------------------------------------------------------------------------------------------------------------------------|
| <p><b>S1.</b> SEM-EDS data</p> <p><b>S2.</b> FTIR data</p> <p><b>S3.</b> TGA data</p> <p><b>S4.</b> Comparative study of GO-PN-CuO catalyst with previously reported catalytic systems.</p> <p><b>S5.</b> NMR data of C-O coupling reactions of aryl halides and substituted phenol</p> <p><b>S6.</b> NMR spectra of cross-coupled products obtained in C-O coupling reactions.</p> | <p><b>Fig. S1.</b> EDS spectrum of GO-PN-CuO</p> <p><b>Fig. S2.</b> EDS spectrum of GO</p> <p><b>Fig. S3.</b> EDS analysis of GO</p> <p><b>Fig. S4.</b> EDS spectrum of GO-COCl</p> <p><b>Fig. S5.</b> EDS analysis of GO-COCl</p> <p><b>Fig. S6.</b> FTIR spectra of P,N ligand</p> <p><b>Fig. S7.</b> FTIR spectra of GO</p> <p><b>Fig. S8.</b> FTIR spectra of GO-PN</p> <p><b>Fig. S9.</b> FTIR spectra of GO-PN-CuO</p> <p><b>Fig. S10.</b> TGA curve for GO-PN-CuO catalyst</p> <p><b>Fig. S11.</b> <math>^{31}\text{P}\{^1\text{H}\}</math> NMR spectrum of hybrid P, N ligand</p> <p><b>Fig. S12.</b> <math>^{31}\text{P}\{^1\text{H}\}</math> NMR spectrum of GO-PN</p> <p><b>Fig. S13.</b> <math>^{31}\text{P}\{^1\text{H}\}</math> NMR spectrum of GO-PN-CuO</p> <p><b>Fig. S14.</b> <math>^1\text{H}</math> NMR spectrum (scale: 1.0 to 15.0 ppm) of 4-nitrodiphenylether</p> <p><b>Fig. S15.</b> <math>^1\text{H}</math> NMR spectrum (scale: 6.5 to 8.5 ppm) of 4-nitrodiphenylether</p> <p><b>Fig. S16.</b> <math>^1\text{H}</math> NMR spectrum (scale: 3.0 to 15.0 ppm) of 4-phenoxy benzaldehyde</p> <p><b>Fig. S17.</b> <math>^1\text{H}</math> NMR spectrum (scale: 6.5 to 10.5 ppm) of 4-phenoxy benzaldehyde</p> <p><b>Fig. S18.</b> <math>^1\text{H}</math> NMR spectrum (scale: 10.0 to 1.0 ppm) of 4-phenoxy benzonitrile</p> <p><b>Fig. S19.</b> <math>^1\text{H}</math> NMR spectrum (scale: 6.5 to 8.5 ppm) of 4-phenoxy benzonitrile</p> <p><b>Fig. S20.</b> <math>^1\text{H}</math> NMR spectrum (scale: 1.0 to 10.0 ppm) of diphenylether</p> | <p><b>Table S1.</b> Comparison of present catalyst (GO-PN-CuO) with previously reported Cu-catalytic system for O-arylation reaction</p> |

|  |                                                                                                                                                                                                                                                                                                                                                                                                                                                                                                                                                                                                                                                                                                                                                                                                                                                                                                                                                                                                                                    |  |
|--|------------------------------------------------------------------------------------------------------------------------------------------------------------------------------------------------------------------------------------------------------------------------------------------------------------------------------------------------------------------------------------------------------------------------------------------------------------------------------------------------------------------------------------------------------------------------------------------------------------------------------------------------------------------------------------------------------------------------------------------------------------------------------------------------------------------------------------------------------------------------------------------------------------------------------------------------------------------------------------------------------------------------------------|--|
|  | <p><b>Fig. S21.</b> <math>^1\text{H}</math> NMR spectrum (scale: 6.5 to 8.5 ppm) of diphenylether</p> <p><b>Fig. S22.</b> <math>^1\text{H}</math> NMR spectrum (scale: 1.0 to 10.0 ppm) of 4-methoxy diphenylether</p> <p><b>Fig. S23.</b> <math>^1\text{H}</math> NMR spectrum (scale: 6.5 to 8.5 ppm) of 4-methoxy diphenylether</p> <p><b>Fig. S24.</b> <math>^1\text{H}</math> NMR spectrum (scale: 6.5 to 8.5 ppm) of 4-acetyl diphenylether</p> <p><b>Fig. S25.</b> <math>^1\text{H}</math> NMR spectrum (scale: 6.5 to 8.5 ppm) of 4-acetyl diphenylether</p> <p><b>Fig. S26.</b> <math>^1\text{H}</math> NMR spectrum (scale: 1.0 to 10.0 ppm) of 4-methyl diphenylether</p> <p><b>Fig. S27.</b> <math>^1\text{H}</math> NMR spectrum (scale: 6.5 to 7.5 ppm) of 4-methyl diphenylether</p> <p><b>Fig. S28.</b> <math>^1\text{H}</math> NMR spectrum (scale: 1.0 to 10.0 ppm) of 2-pyridine phenylether</p> <p><b>Fig. S29.</b> <math>^1\text{H}</math> NMR spectrum (scale: 6.0 to 8.0 ppm) of 2-pyridine phenylether</p> |  |
|--|------------------------------------------------------------------------------------------------------------------------------------------------------------------------------------------------------------------------------------------------------------------------------------------------------------------------------------------------------------------------------------------------------------------------------------------------------------------------------------------------------------------------------------------------------------------------------------------------------------------------------------------------------------------------------------------------------------------------------------------------------------------------------------------------------------------------------------------------------------------------------------------------------------------------------------------------------------------------------------------------------------------------------------|--|

### S1. SEM-EDS DATA

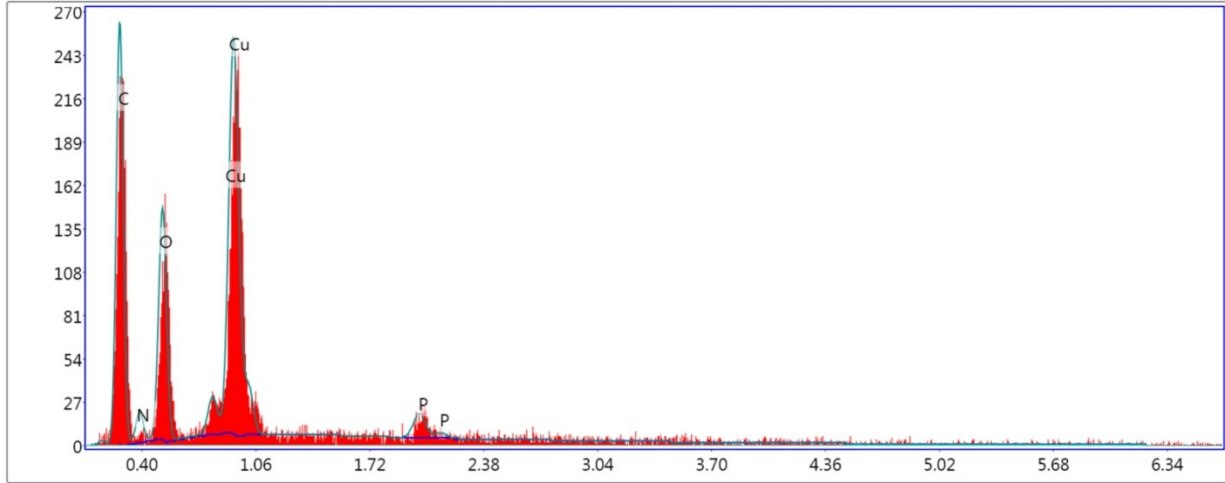

Lsec: 30.0 0 Cnts 0.000 keV Det: Apollo X-SDD Det

| Element | Weight % | Atomic % | Error % | Kratio |
|---------|----------|----------|---------|--------|
| C K     | 40.33    | 58.89    | 9.61    | 0.20   |
| N K     | 7.63     | 9.56     | 22.80   | 0.02   |
| O K     | 20.36    | 22.32    | 11.67   | 0.07   |
| CuL     | 29.98    | 8.28     | 5.44    | 0.19   |
| P K     | 1.69     | 0.96     | 26.83   | 0.01   |

**Fig. S1.** EDS spectrum of GO-PN-CuO

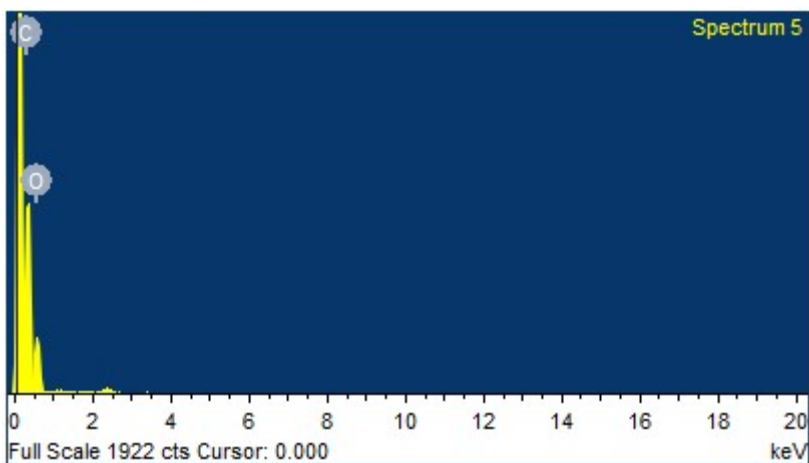

**Fig. S2.** EDS spectrum of GO

| Element | Atomic % | Weight % |
|---------|----------|----------|
| C       | 72.88    | 66.86    |
| O       | 27.12    | 33.14    |

**Fig. S3.** EDS analysis of GO

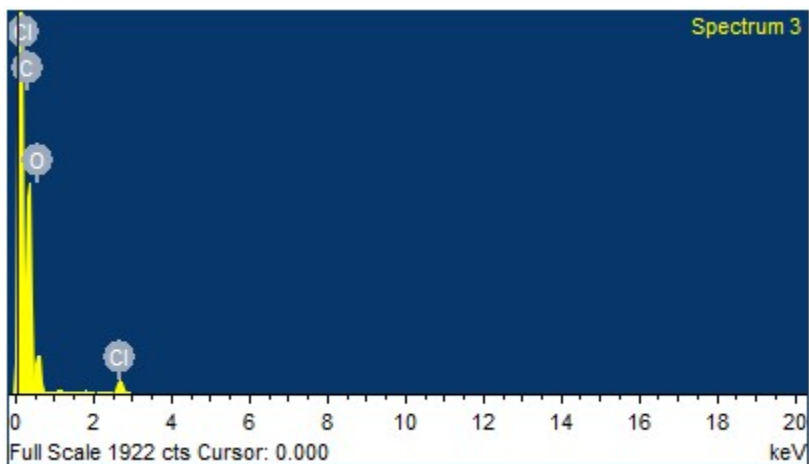

**Fig. S4.** EDS spectrum of GO-COCl

| Element | Atomic % | Weight % |
|---------|----------|----------|
| C       | 79.61    | 73.68    |
| O       | 19.61    | 24.18    |
| Cl      | 0.78     | 2.14     |

**Fig. S5.** EDS analysis of GO-COCl

**S2. FTIR DATA**

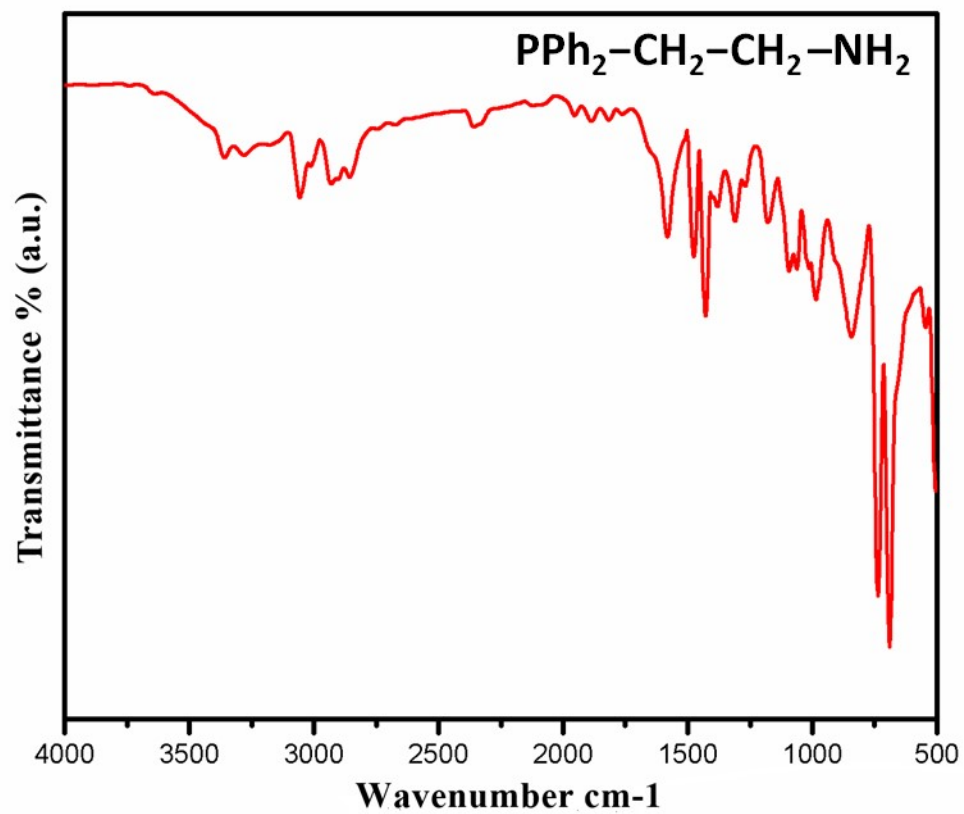

**Fig. S6.** FTIR spectrum of hybrid P,N ligand

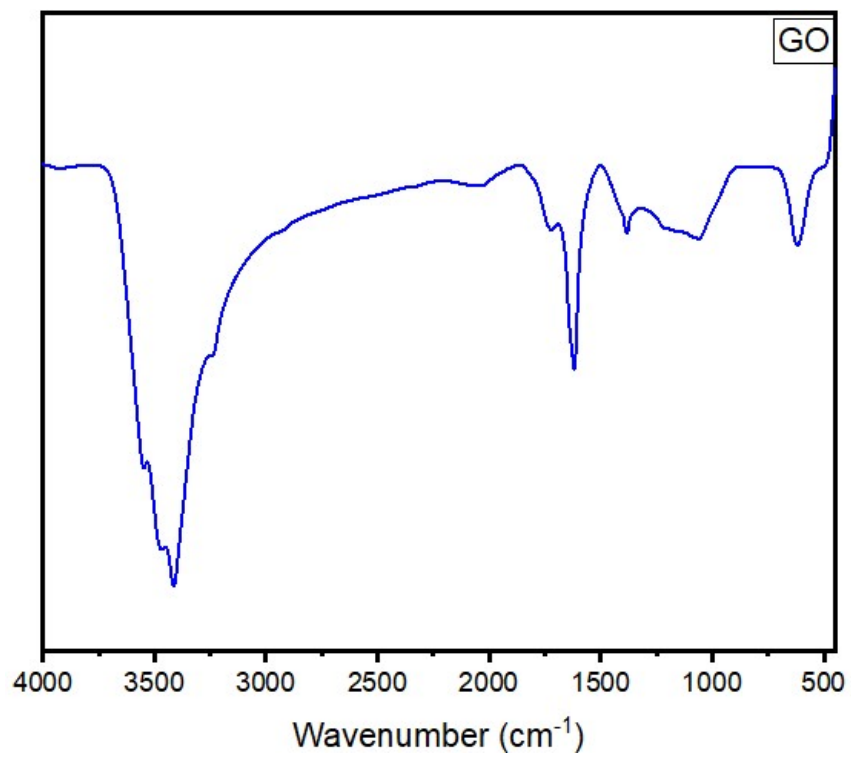

**Fig. S7.** FTIR spectra of GO

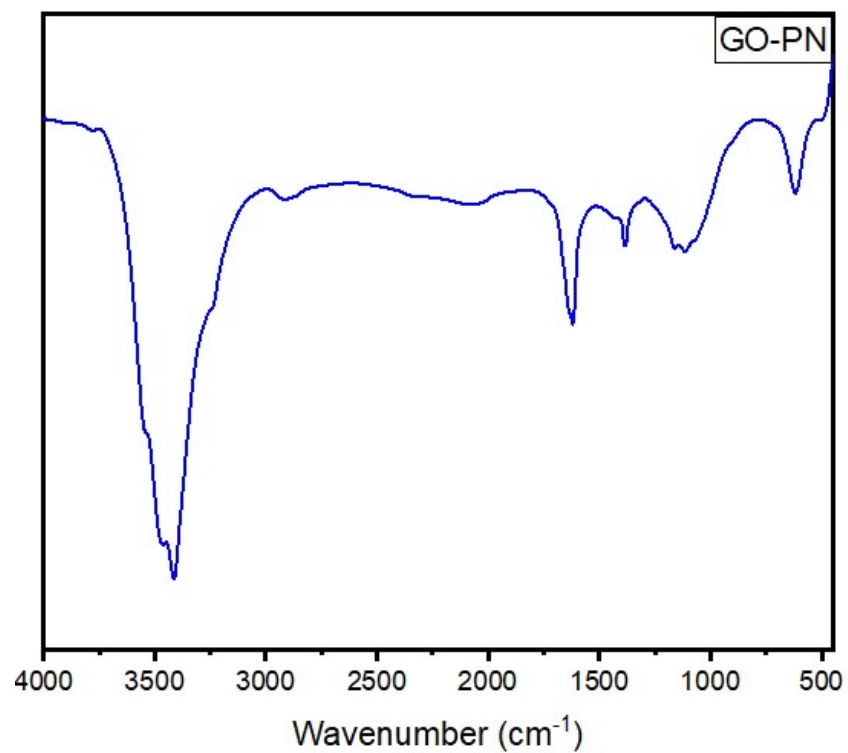

**Fig. S8.** FTIR spectra of GO-PN

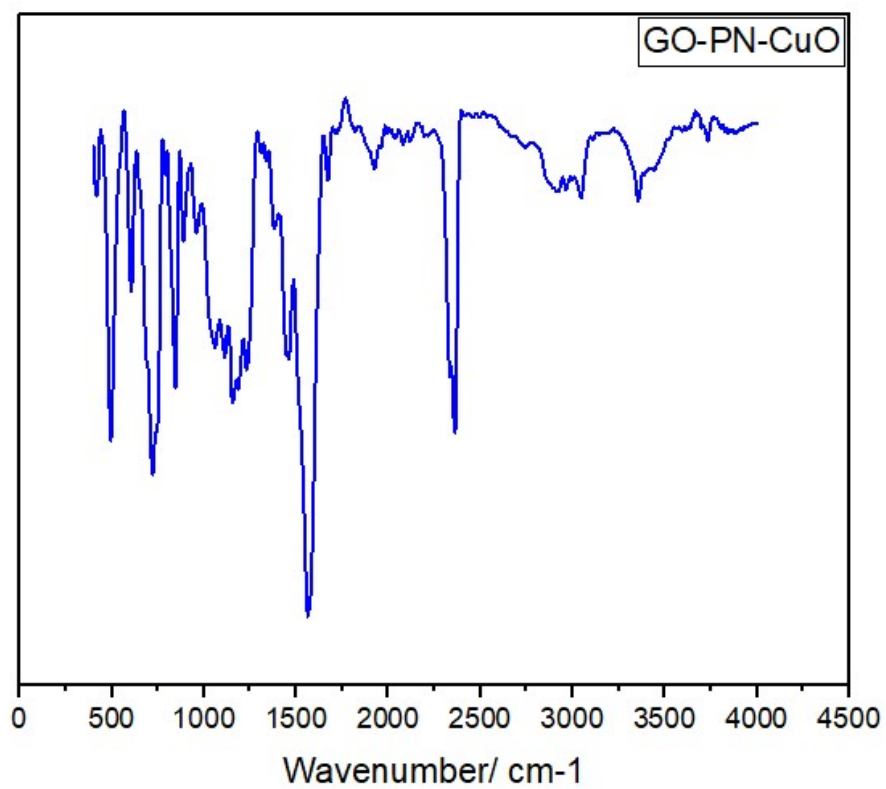

**Fig. S9.** FTIR spectra of GO-PN-CuO



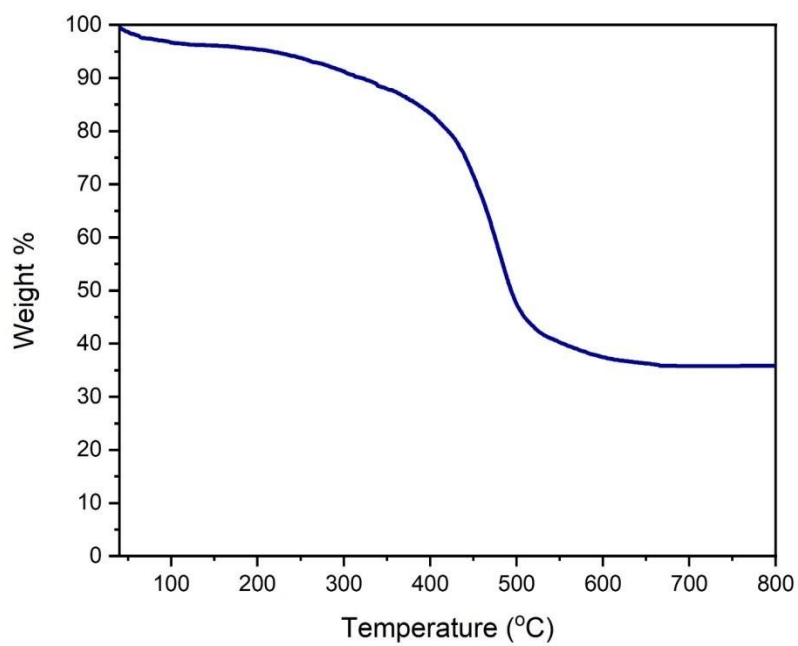

**Fig. S10.** TGA curve for GO-PN-CuO catalyst

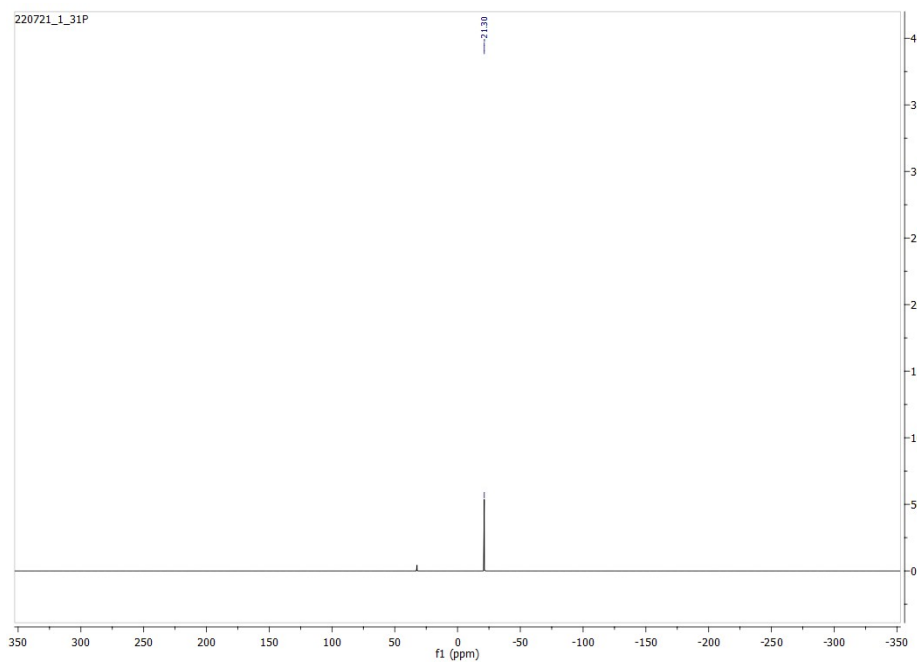

**Fig. S11.**  $^{31}\text{P}\{^1\text{H}\}$  NMR spectrum of hybrid P, N ligand ( $\text{Ph}_2\text{P-CH}_2\text{-CH}_2\text{-NH}_2$ ) having signal at  $-21.30$  ppm.

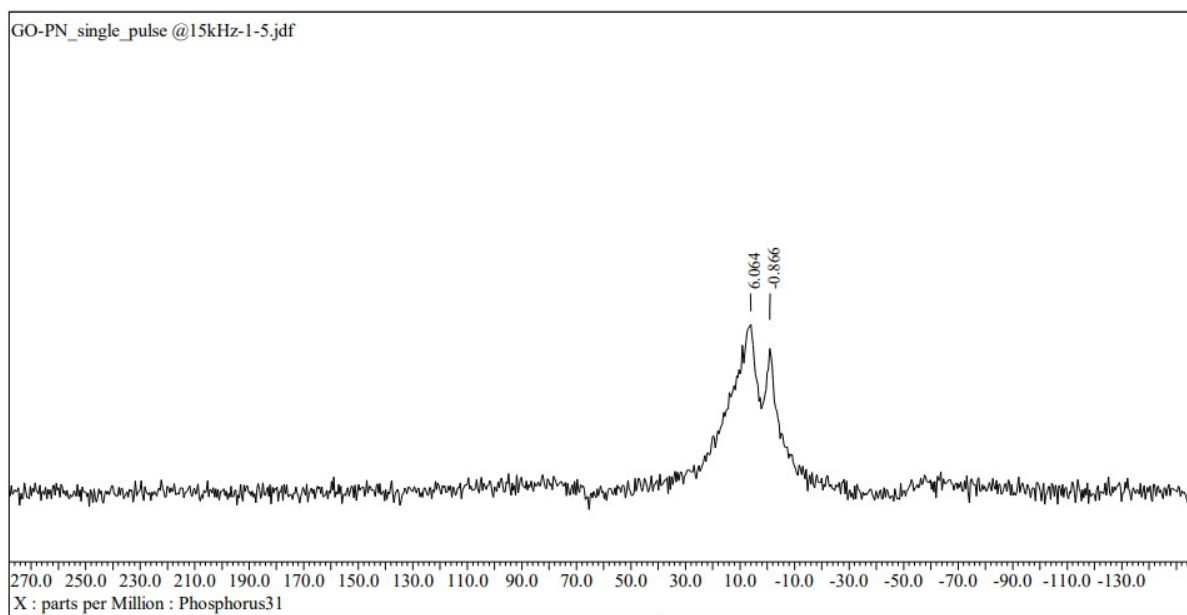

**Fig. S12.** Solid state  $^{31}\text{P}$  NMR spectrum of GO-PN having  $\text{Ph}_2\text{P-CH}_2\text{-CH}_2\text{-NH}_2$  on the surface of Graphene Oxide.

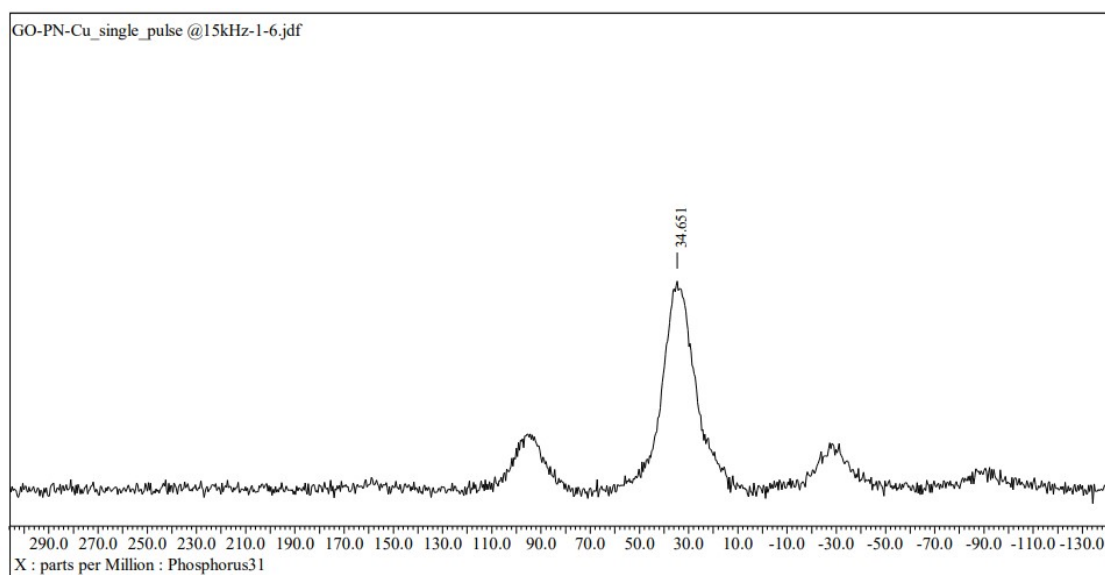

**Fig. S13.** Solid state  $^{31}\text{P}$  NMR spectrum of GO-PN-CuO having immobilized nanoparticles of copper(II) oxide on functionalized Graphene Oxide with  $\text{Ph}_2\text{P-CH}_2\text{-CH}_2\text{-NH}_2$

#### **S4. Comparative study of GO-PN-CuO catalyst with reported/known catalytic systems.**

The efficacy of GO-PN-CuO nanocatalytic system for C-O coupling reaction of bromobenzene with phenol has been compared with some earlier reported catalysts as demonstrated in Table S1. As can be seen, GO-PN-CuO performs the reaction at 100 °C in 12 h of reaction time at a low

catalyst loading of 2.25 mol% and exhibits high catalytic efficiency upto 99% conversion for this reaction.

**Table S1.** Comparison of present catalyst (GO-PN-CuO) with previously reported Cu-catalytic system for O-arylation reaction

| Entry | Catalyst                                                | Solvent | Catalyst Amount | Time | Temperature | Yield | Reference |
|-------|---------------------------------------------------------|---------|-----------------|------|-------------|-------|-----------|
| 1.    | Cu <sub>1.8</sub> S nanoflowers*                        | DMSO    | 1.25 mol%       | 8h   | 120°C       | 61%   | 1         |
| 2.    | GO-Cu <sub>1.8</sub> S nanocomposite*                   | DMSO    | 1.25 mol%       | 8h   | 120°C       | 74%   | 1         |
| 3.    | NF/GNRS/Cu                                              | ACN     | 10 mol%         | 7h   | 80°C        | 90%   | 2         |
| 4.    | Fe <sub>3</sub> O <sub>4</sub> @SiO <sub>2</sub> -BT-Cu | DES     | 2 mol%          | 10h  | 100°C       | 93%   | 3         |
| 5.    | Cu <sub>2</sub> O NPs                                   | DMAc    | 3 mol%          | 24h  | 27°C        | 79%   | 4         |
| 6.    | CuNPs@Q-POP                                             | DMF     | 7.3 mol%        | 24h  | 110°C       | 80%   | 5         |
| 7.    | CuFe <sub>2</sub> O <sub>4</sub> /Ligand                | NMP     | 5 mol%          | 24h  | 135°C       | 34%   | 6         |
| 8.    | This work                                               | DMSO    | 2.25 mol%       | 12h  | 110°C       | 99%   |           |

## S5. NMR data of cross-coupled products of C–O coupling reactions of aryl halides and phenol or derivatives of phenol

### S5.1. 1-Nitro-4-phenoxy benzene:

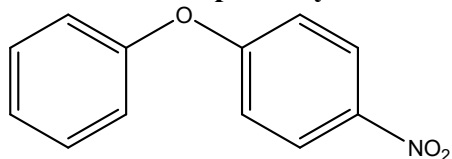

Yellow solid, m.p. 52-55 °C (Lit. 56-57 °C)<sup>7</sup>. <sup>1</sup>H NMR (500 MHz, CDCl<sub>3</sub>, 25°C vs TMS), δ(ppm): 8.11-8.14 (d, 2H), 7.34-7.40 (t, 2H), 7.16-7.21 (t, 1H), 7.01-7.03 (d, 2H), 6.92-6.95 (d, 2H).

### S5.2. 4-Phenoxybenzaldehyde:

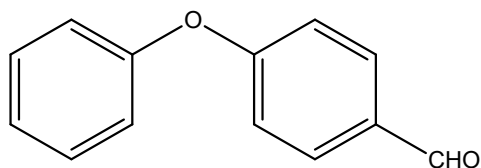

Yellow liquid, m.p. 24-26 °C. <sup>1</sup>H NMR (500 MHz, CDCl<sub>3</sub>, 25°C vs TMS), δ(ppm): 9.92 (s, 1H), 7.84-7.86 (d, 2H), 7.40-7.45 (t, 2H), 7.20-7.26 (m, 1H), 7.05-7.11 (t, 4h).

**S5.3. 1-Methyl-4-phenoxybenzene:**

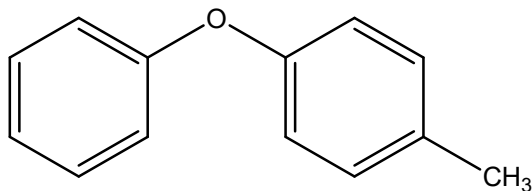

Colorless solid, m.p. 100-104 °C . <sup>1</sup>H NMR (500 MHz, CDCl<sub>3</sub>, 25°C vs TMS), δ(ppm): 7.46-7.48 (m, 2H), 7.23-7.26 (t, 2H), 7.06-7.07 (m, 1H), 6.98-7.04 (m, 2H), 6.89-6.91 (m, 2H), 2.26 (s, 3H).

**S5.4. 1-Methoxy-4-phenoxybenzene:**

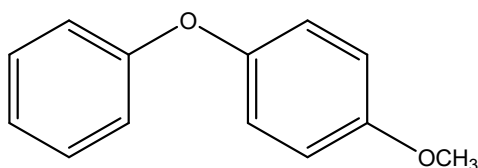

Colorless liquid, m.p. 10-14 °C . <sup>1</sup>H NMR (500 MHz, CDCl<sub>3</sub>, 25°C vs TMS), δ(ppm): 7.25-7.32 (m, 2H), 7.01-7.06 (t, 1H), 6.93-7.01 (m, 4H), 6.86-6.90 (m, 2H), 3.81 (s, 3H).

**S5.5. Diphenyl ether:**

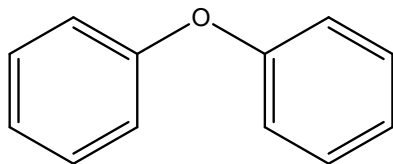

Colorless liquid, m.p. 25-29 °C (Lit. 26-27 °C)<sup>8</sup>. <sup>1</sup>H NMR (500 MHz, CDCl<sub>3</sub>), δ(ppm): 7.25 (t, 4H), 6.93 (t, 2H), 7.37 (d, 4H).

**S5.6. 4-Phenoxybenzotrile:**

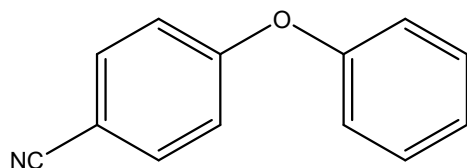

Colourless solid, m.p. 41-44 °C (Lit. 45-46 °C)<sup>9</sup>. <sup>1</sup>H NMR (500 MHz, CDCl<sub>3</sub>), δ(ppm): 7.55 (d, 2H), 7.43 (t, 2H), 7.20 (t, 1H), 7.00 (d, 2H), 6.95 (d, 2H).

**S5.7. 1-(4-Phenoxyphenyl)ethanone:**

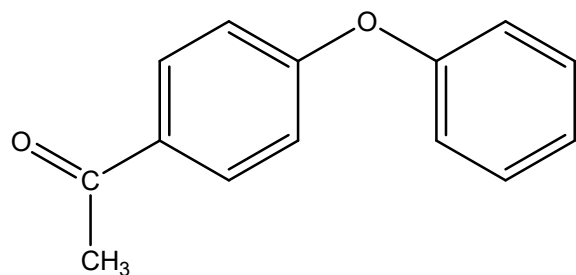

Colourless solid, m.p. 50-52 °C.  $^1\text{H NMR}$  (500 MHz,  $\text{CDCl}_3$ ),  $\delta(\text{ppm})$ : 7.93 (m, 2H), 7.37-7.41 (m, 2H), 7.18-7.21 (t, 1H), 7.08-7.06 (m, 2H), 6.98-7.00 (m, 2H), 2.57 (s, 3H).

### S5.8. 2-Phenoxy pyridine:

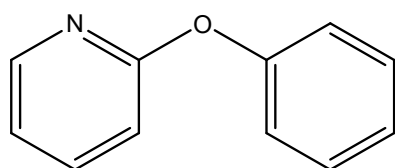

Colourless oil, m.p. 46-48 °C.  $^1\text{H NMR}$  (500 MHz,  $\text{CDCl}_3$ ),  $\delta(\text{ppm})$ : 7.689-7.65 (M, 1H), 7.48-7.46 (m, 1H), 7.12 (t, 2H), 6.89-6.84 (m, 5H).

### S6. NMR spectra of cross-coupled products of C-O coupling reactions:

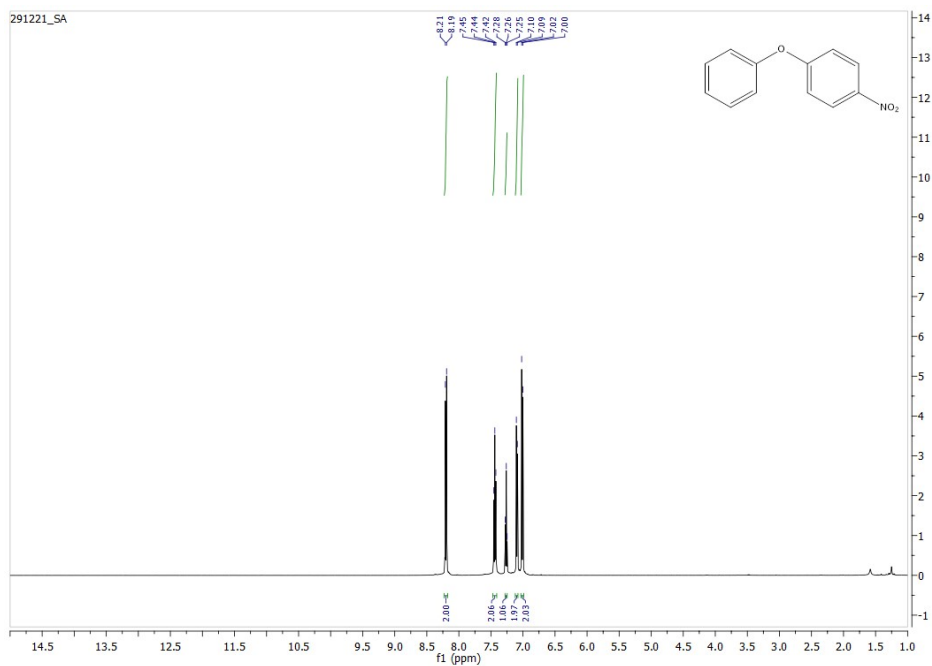

**Fig. S14.**  $^1\text{H NMR}$  spectrum (scale: 1.0 to 15.0 ppm) of 4-nitrodiphenylether

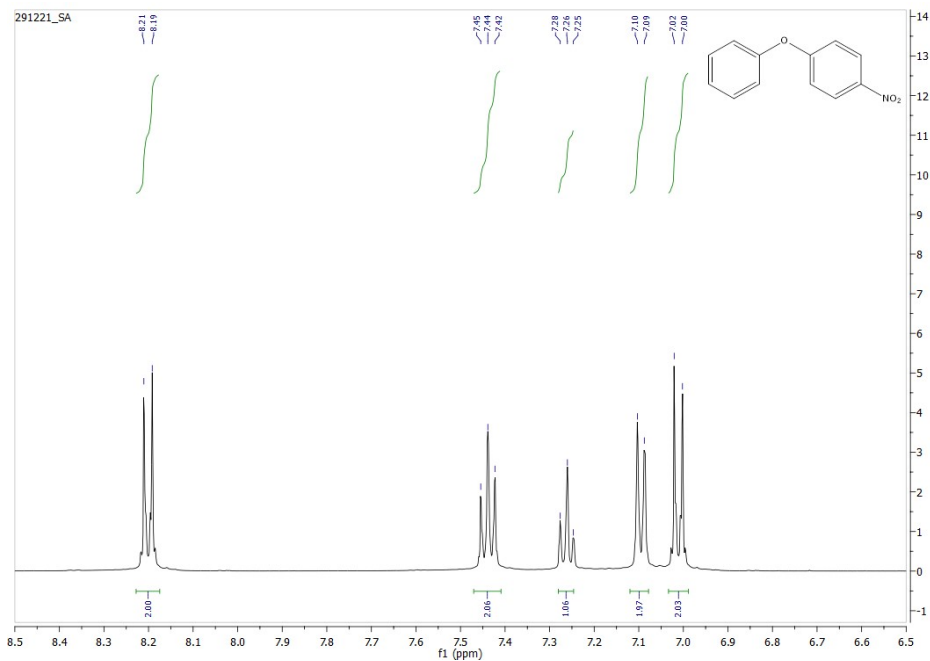

**Fig. S15.**  $^1\text{H}$  NMR spectrum (scale: 6.5 to 8.5 ppm) of 4-nitrodiphenylether

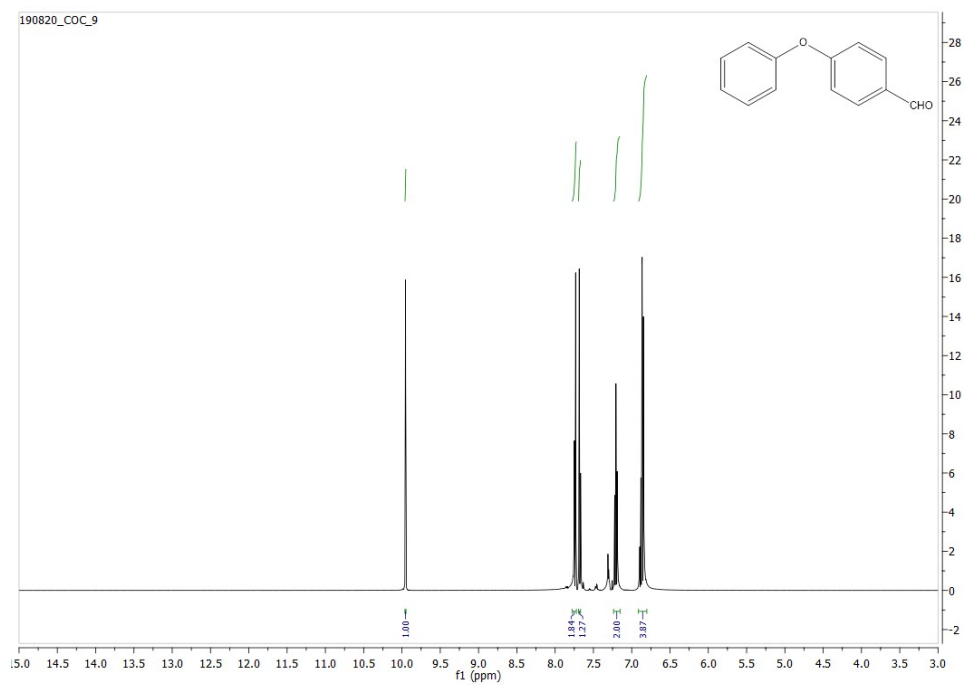

**Fig. S16.**  $^1\text{H}$  NMR spectrum (scale: 3.0 to 15.0 ppm) of 4-phenoxy benzaldehyde

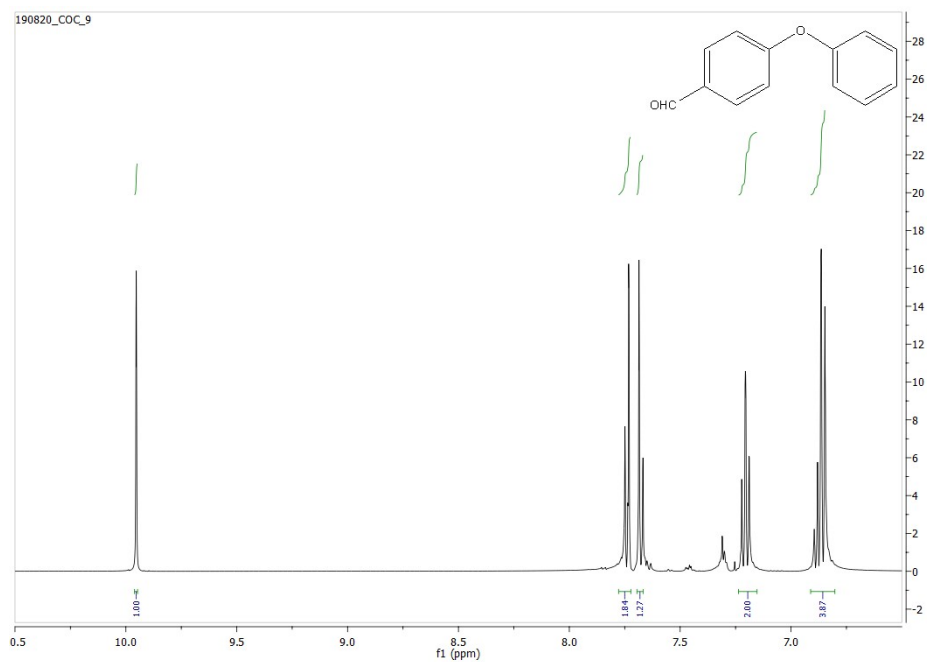

**Fig. S17.**  $^1\text{H}$  NMR spectrum (scale: 6.5 to 10.5 ppm) of 4-phenoxy benzaldehyde

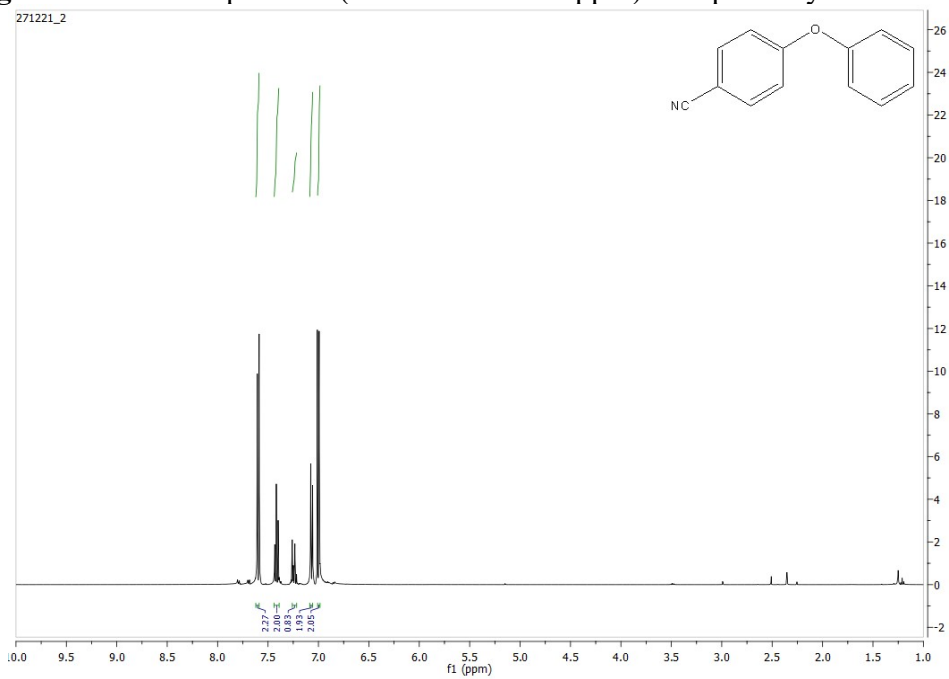

**Fig. S18.**  $^1\text{H}$  NMR spectrum (scale: 10.0 to 1.0 ppm) of 4-phenoxy benzonitrile

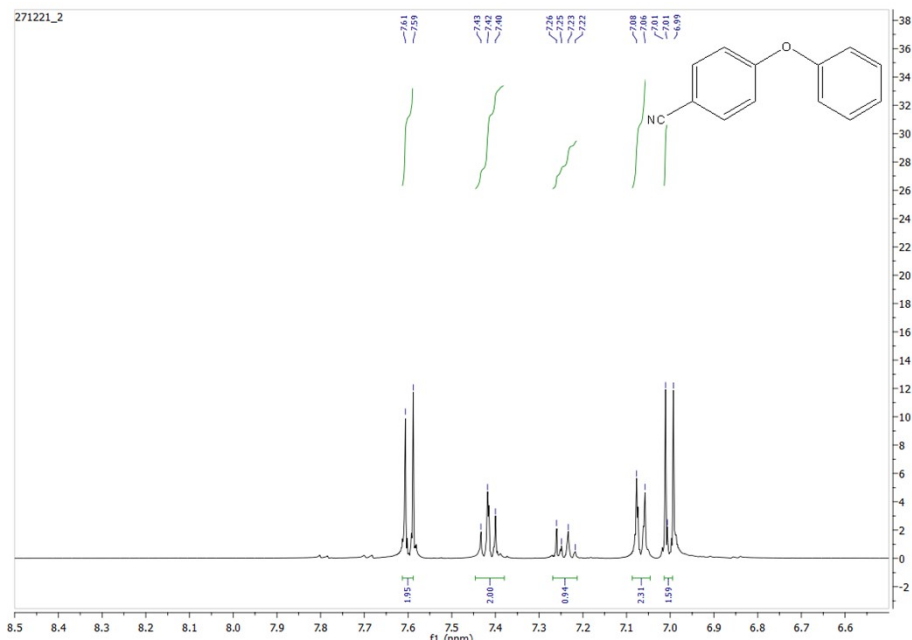

**Fig. S19.**  $^1\text{H}$  NMR spectrum (scale: 6.5 to 8.5 ppm) of 4-phenoxy benzonitrile

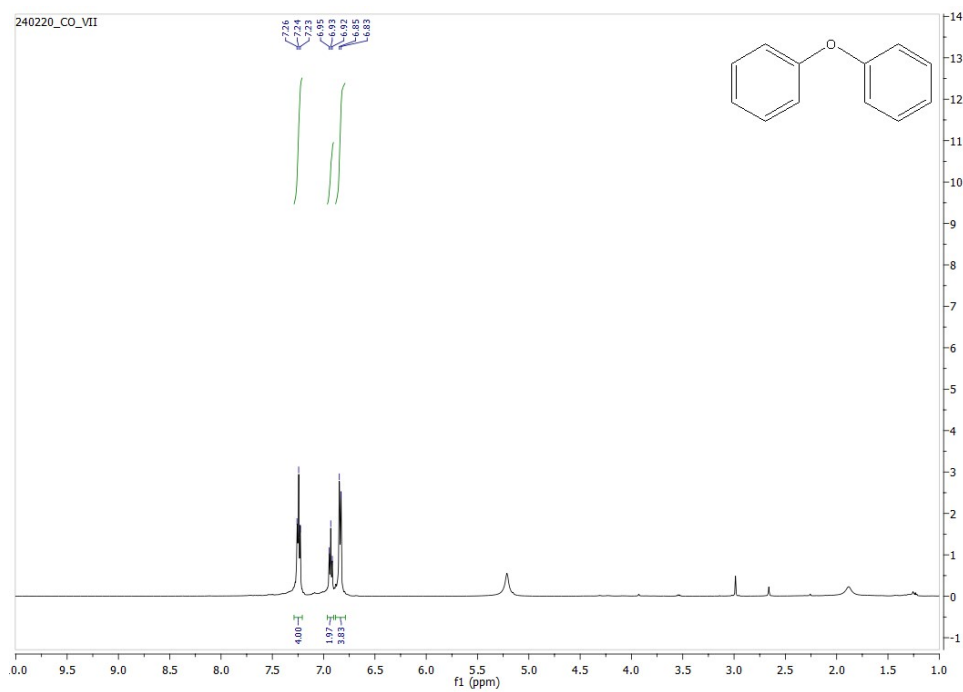

**Fig. S20.**  $^1\text{H}$  NMR spectrum (scale: 1.0 to 10.0 ppm) of diphenylether



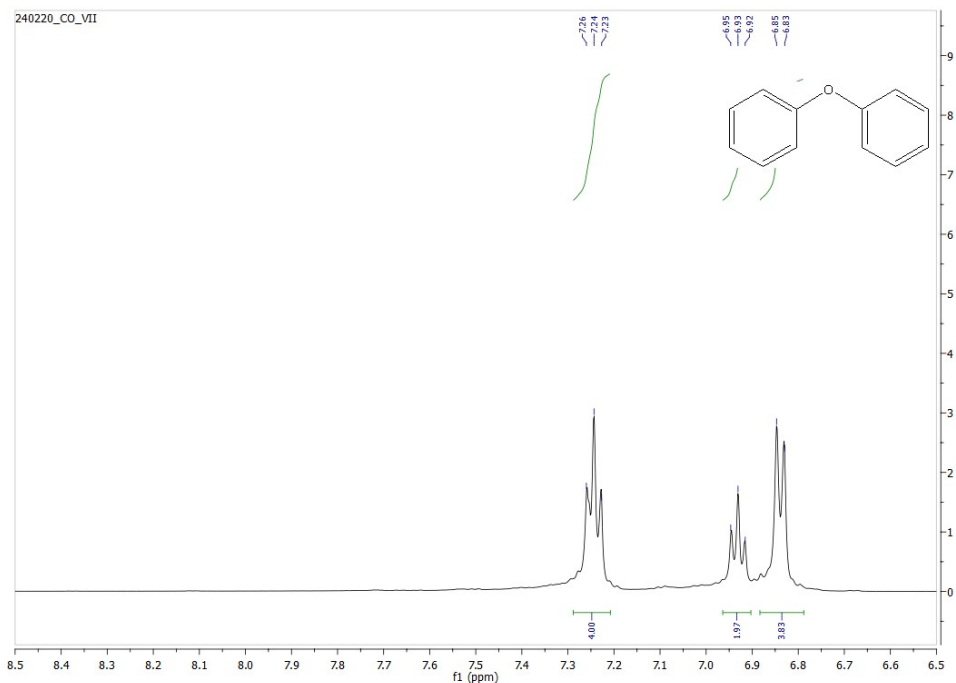

**Fig. S21.**  $^1\text{H}$  NMR spectrum (scale: 6.5 to 8.5 ppm) of diphenylether

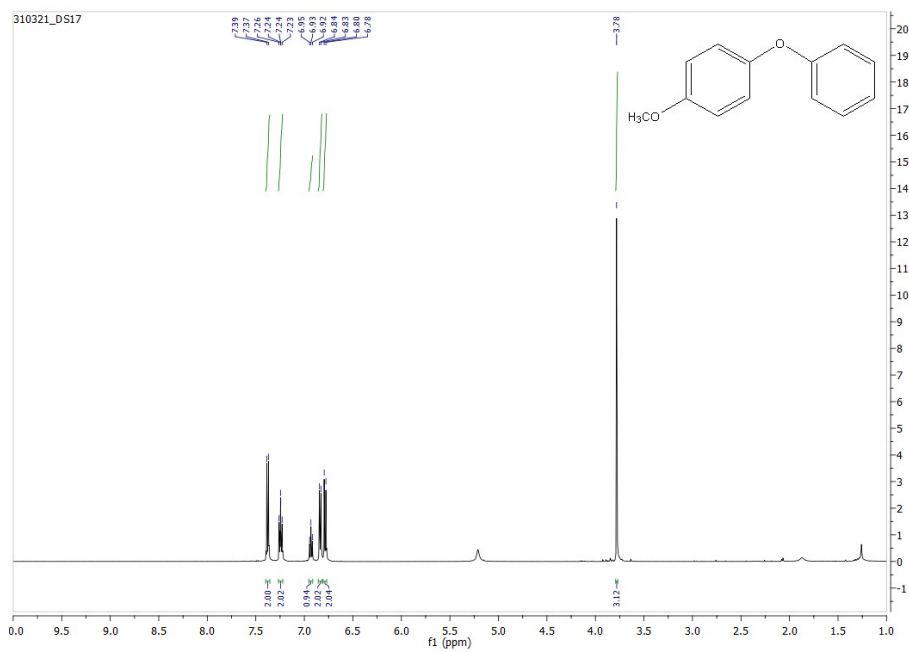

**Fig. S22.**  $^1\text{H}$  NMR spectrum (scale: 1.0 to 10.0 ppm) of 4-methoxy diphenylether

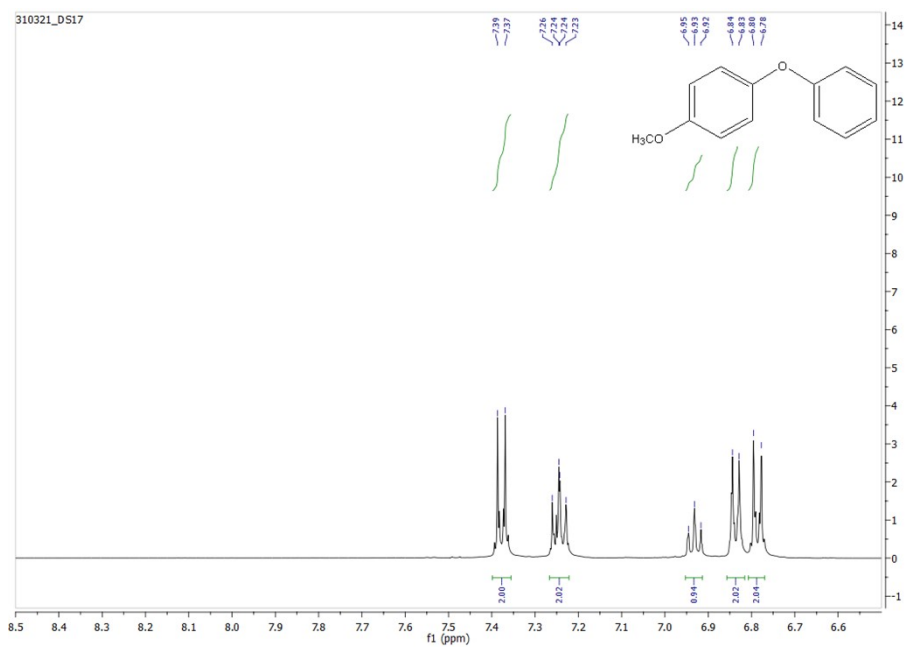

**Fig. S23.**  $^1\text{H}$  NMR spectrum (scale: 6.5 to 8.5 ppm) of 4-methoxy diphenylether

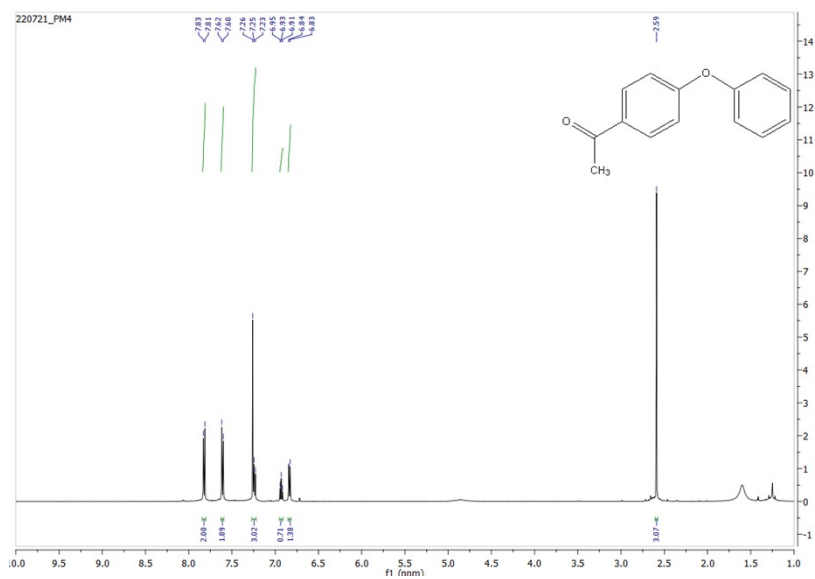

**Fig. S24.**  $^1\text{H}$  NMR spectrum (scale: 6.5 to 8.5 ppm) of 4-acetyl diphenylether

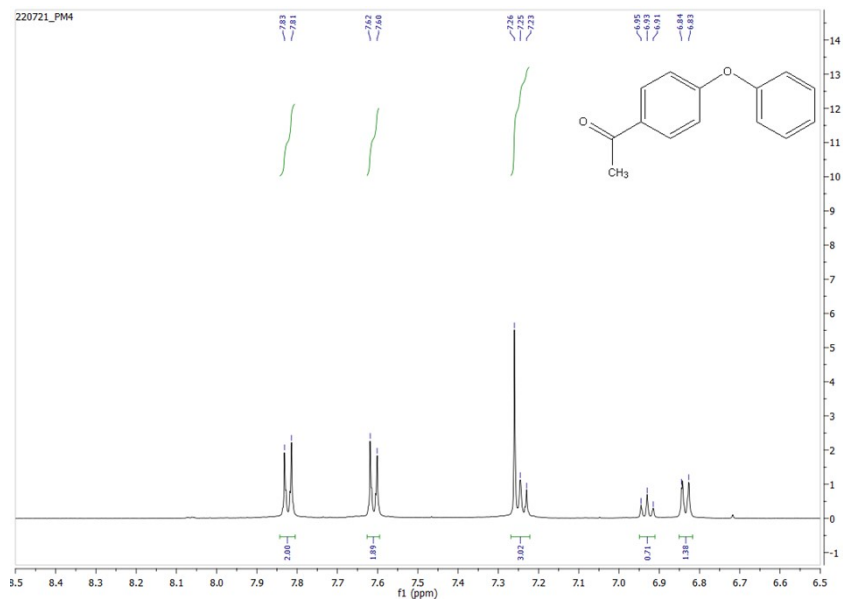

**Fig. S25.** <sup>1</sup>H NMR spectrum (scale: 6.5 to 8.5 ppm) of 4-acetyl diphenylether

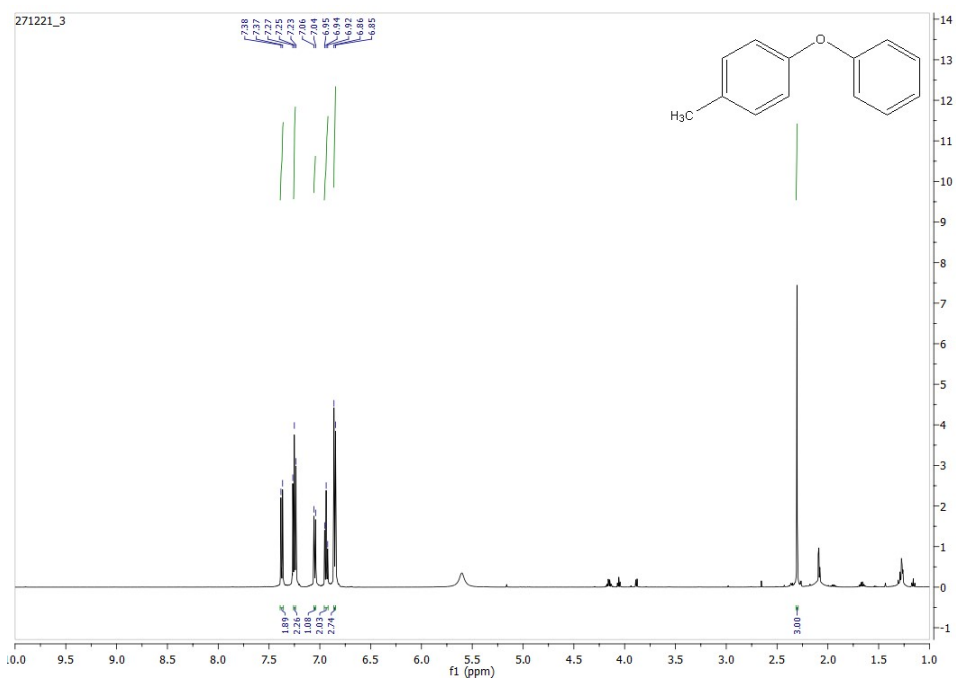

**Fig. S26.** <sup>1</sup>H NMR spectrum (scale: 1.0 to 10.0 ppm) of 4-methyl diphenylether

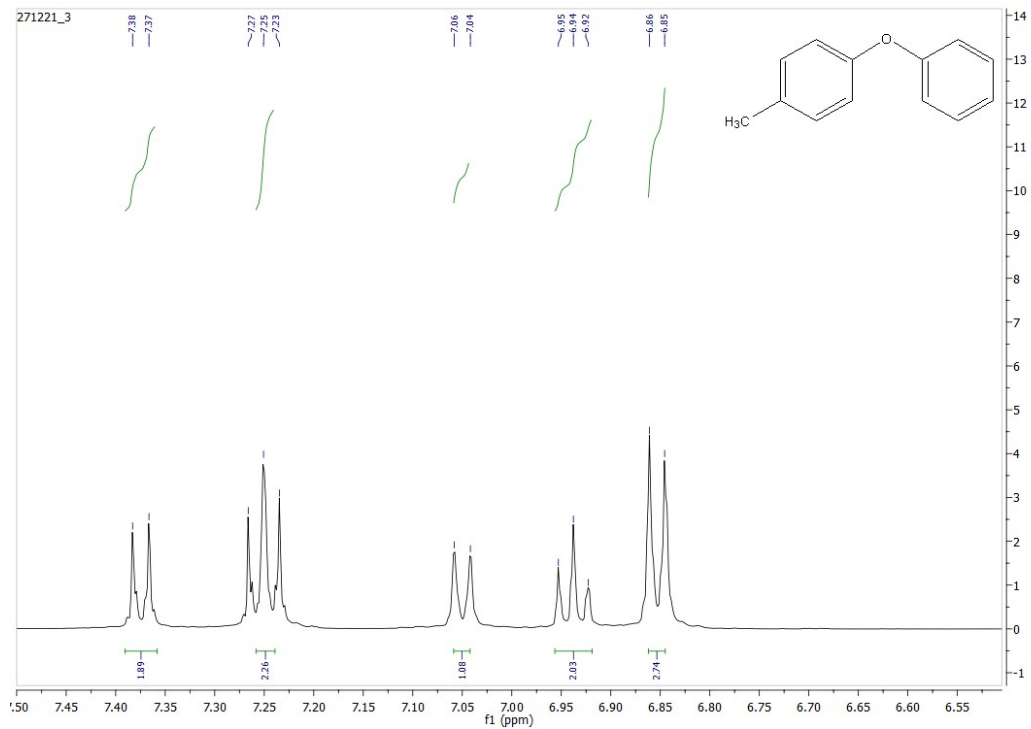

**Fig. S27.**  $^1\text{H}$  NMR spectrum (scale: 6.5 to 7.5 ppm) of 4-methyl diphenylether

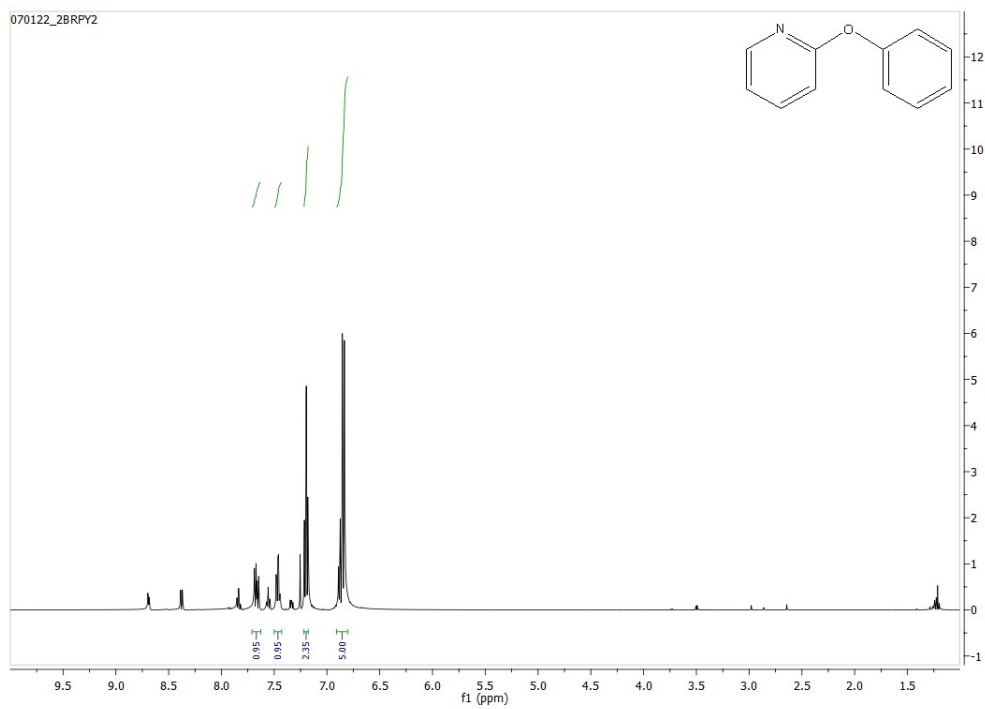

**Fig. S28.**  $^1\text{H}$  NMR spectrum (scale: 1.0 to 10.0 ppm) of 2-pyridine phenylether

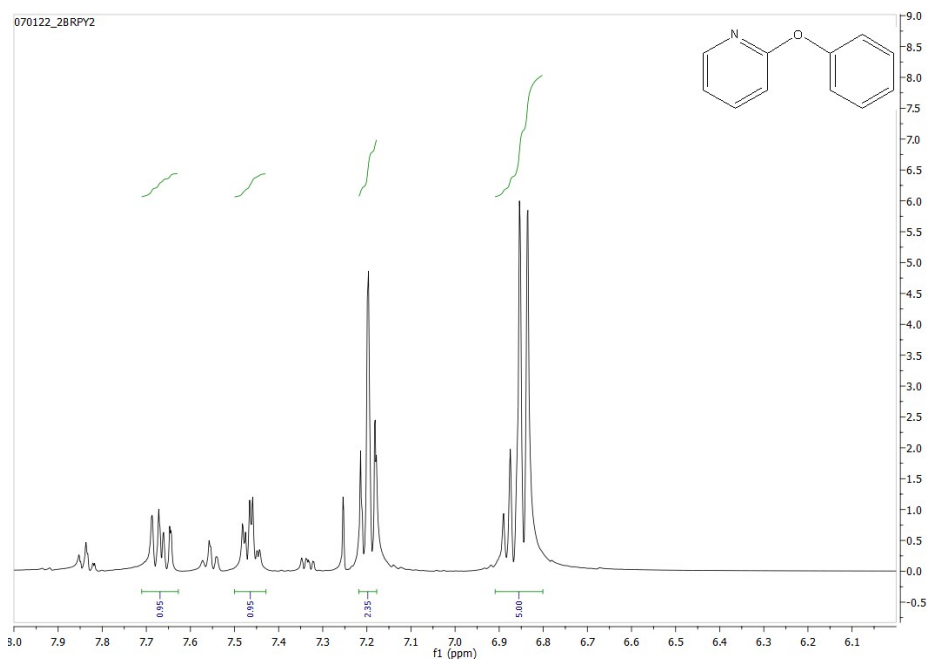

**Fig. S29.**  $^1\text{H}$  NMR spectrum (scale: 6.0 to 8.0 ppm) of 2-pyridine phenylether

## References

- [1] V. V. Singh and A. K. Singh, *ACS Appl. Nano Mater.*, 2018, **1**, 2164-2174.
- [2] A. S. Singh, S. S. Shendage and J. M. Nagarkar, *Tetrahedron Lett.*, 2014, **55**, 4917-4922.
- [3] M. Niakan, S. Karimi, M. Masteri-Farahani and H. Shekaari, *Colloids Surf., A*, 2021, **620**, 126603.
- [4] F. Gorginpour and H. Zali-Boeini, *Mol. Catal.*, 2021, **504**, 111460.
- [5] S. G. Babu and R. Karvembu, *Tetrahedron Lett.*, 2013, **54**, 1677-1680.
- [6] S. Yang, C. Wu, H. Zhou, Y. Yang, Y. Zhao, C. Wang and J. Xu, *Adv. Synth. Catal.*, 2013, **355**, 53-58.
- [7] M. J. Rarick, R. Q. Brewster and F. B. Dains, *J. Am. Chem. Soc.*, 1933, **55**, 1289-1290.

[8] G. T. Furukawa, D. C. Ginnings, R. E. McCoskey and R. A. Nelson, *J. Res. NBS*, 1951, **46**, 195-206.

[9] F. Li, Q. Meng, H. Chen, Z. Li, Q. Wang and F. Tao, *Synthesis*, 2005, **2005**, 1305-1313.
